# Supplementary material for: HOTTIP lncRNA Promotes Hematopoietic Stem Cell Self-Renewal Leading to AML-like Disease in Mice
Source: PubMed Central journal article supplement — Cancer Cell. Author manuscript; Available in PMC 2020 Dec 9. (PMC6917035; doi:10.1016/j.ccell.2019.10.011), 2019-11-27
Supplement: NIHMS1542112-supplement-2.pdf [file NIHMS1542112-supplement-2.pdf]

A

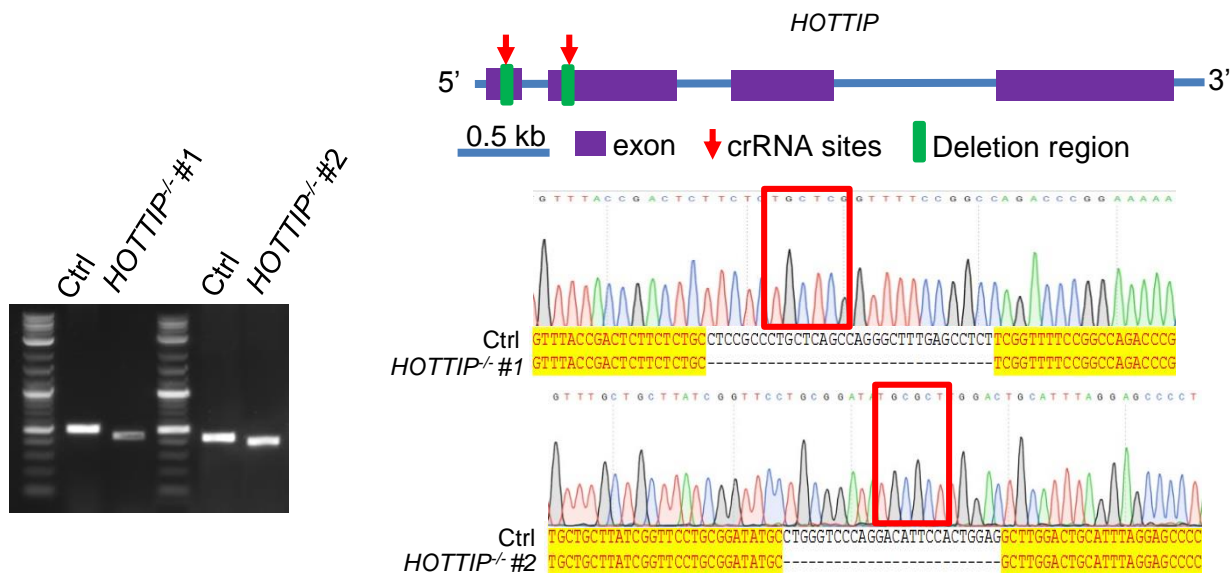

B

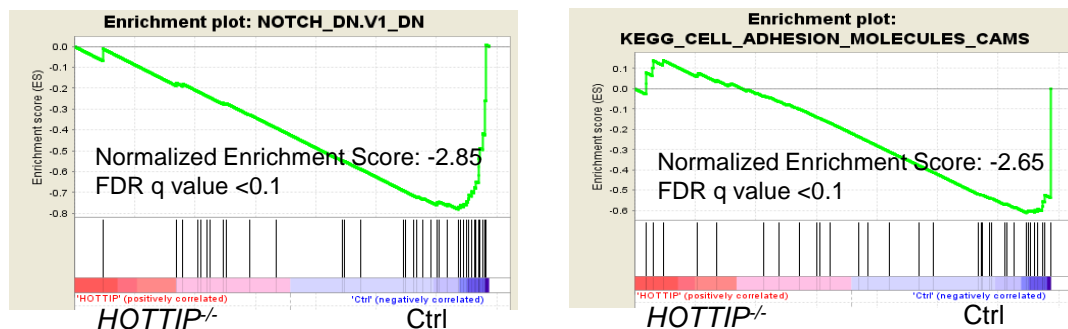

C

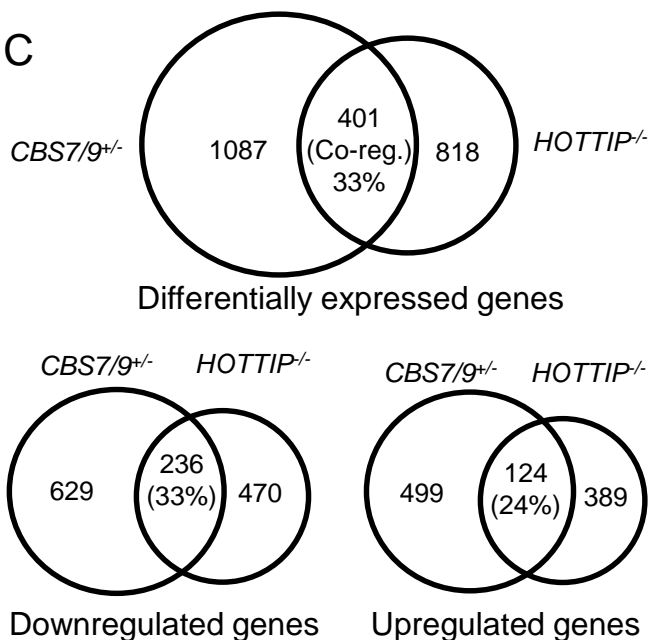

D

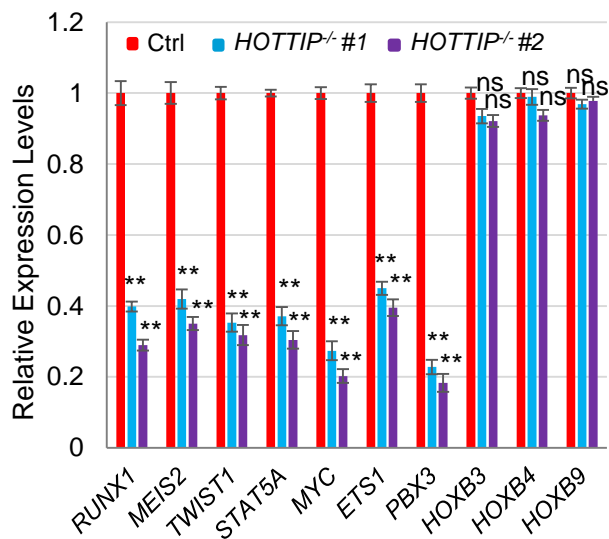

**Supplementary Figure 1. Related to Figure 1; *HOTTIP* loss led to inhibition of posterior HOXA genes and other genes critical for hematopoiesis and leukemogenesis (A)** PCR based genotyping and Sanger sequencing confirmation of two CRISPR-Cas9 mediated *HOTTIP*<sup>-/-</sup> clones in MOLM13 cells. **(B)** Enrichment of downregulated target genes involved in NOTCH signaling and cell adhesion/migration pathways in the *HOTTIP*<sup>-/-</sup> clones compared to WT control as shown by GSEA. **(C)** Overlap between differentially expressed genes by comparing RNA-seq data obtained from the *HOTTIP*<sup>-/-</sup> and the CBS7/9 boundary attenuated MOLM13 cells. **(D)** RT-qPCR validation of the key altered hematopoietic/leukemic genes identified by RNA-seq analysis of the WT control and two *HOTTIP*<sup>-/-</sup> clones. Data is presented as mean ± SD from three or four independent experiments; \*p<0.05; \*\*p<0.01 by Student's t-test.

**A**

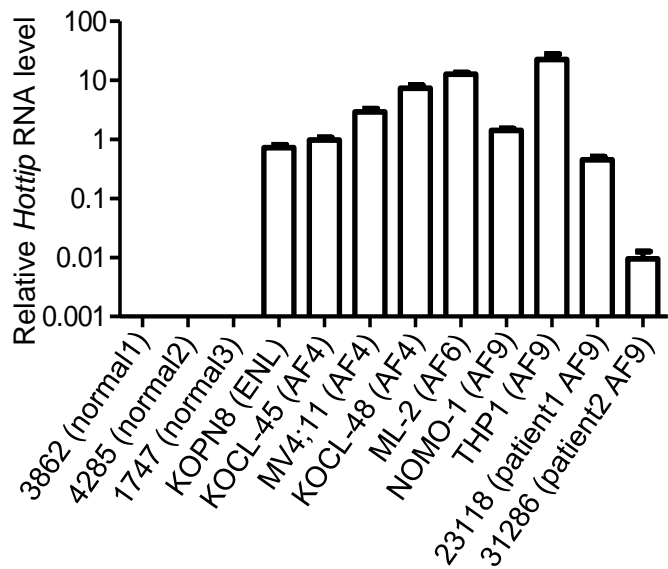

**B**

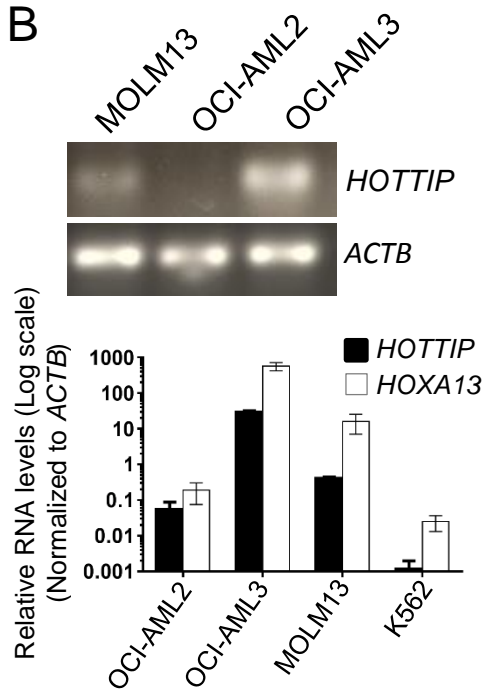

**Supplementary Figure 2. Related to Figure 2; *HOTTIP* is aberrantly expressed in AML patients and cell lines.** (A) Expression of *HOTTIP* in normal healthy individual, MLL rearranged AML cell lines and patients by RT-qPCR. Data represents mean  $\pm$  SD from three independent experiments. (B) Expression of *HOTTIP* in MOLM13, OCI-AML3 and OCI-AML2 cells determined by RT-PCR or RT-qPCR.

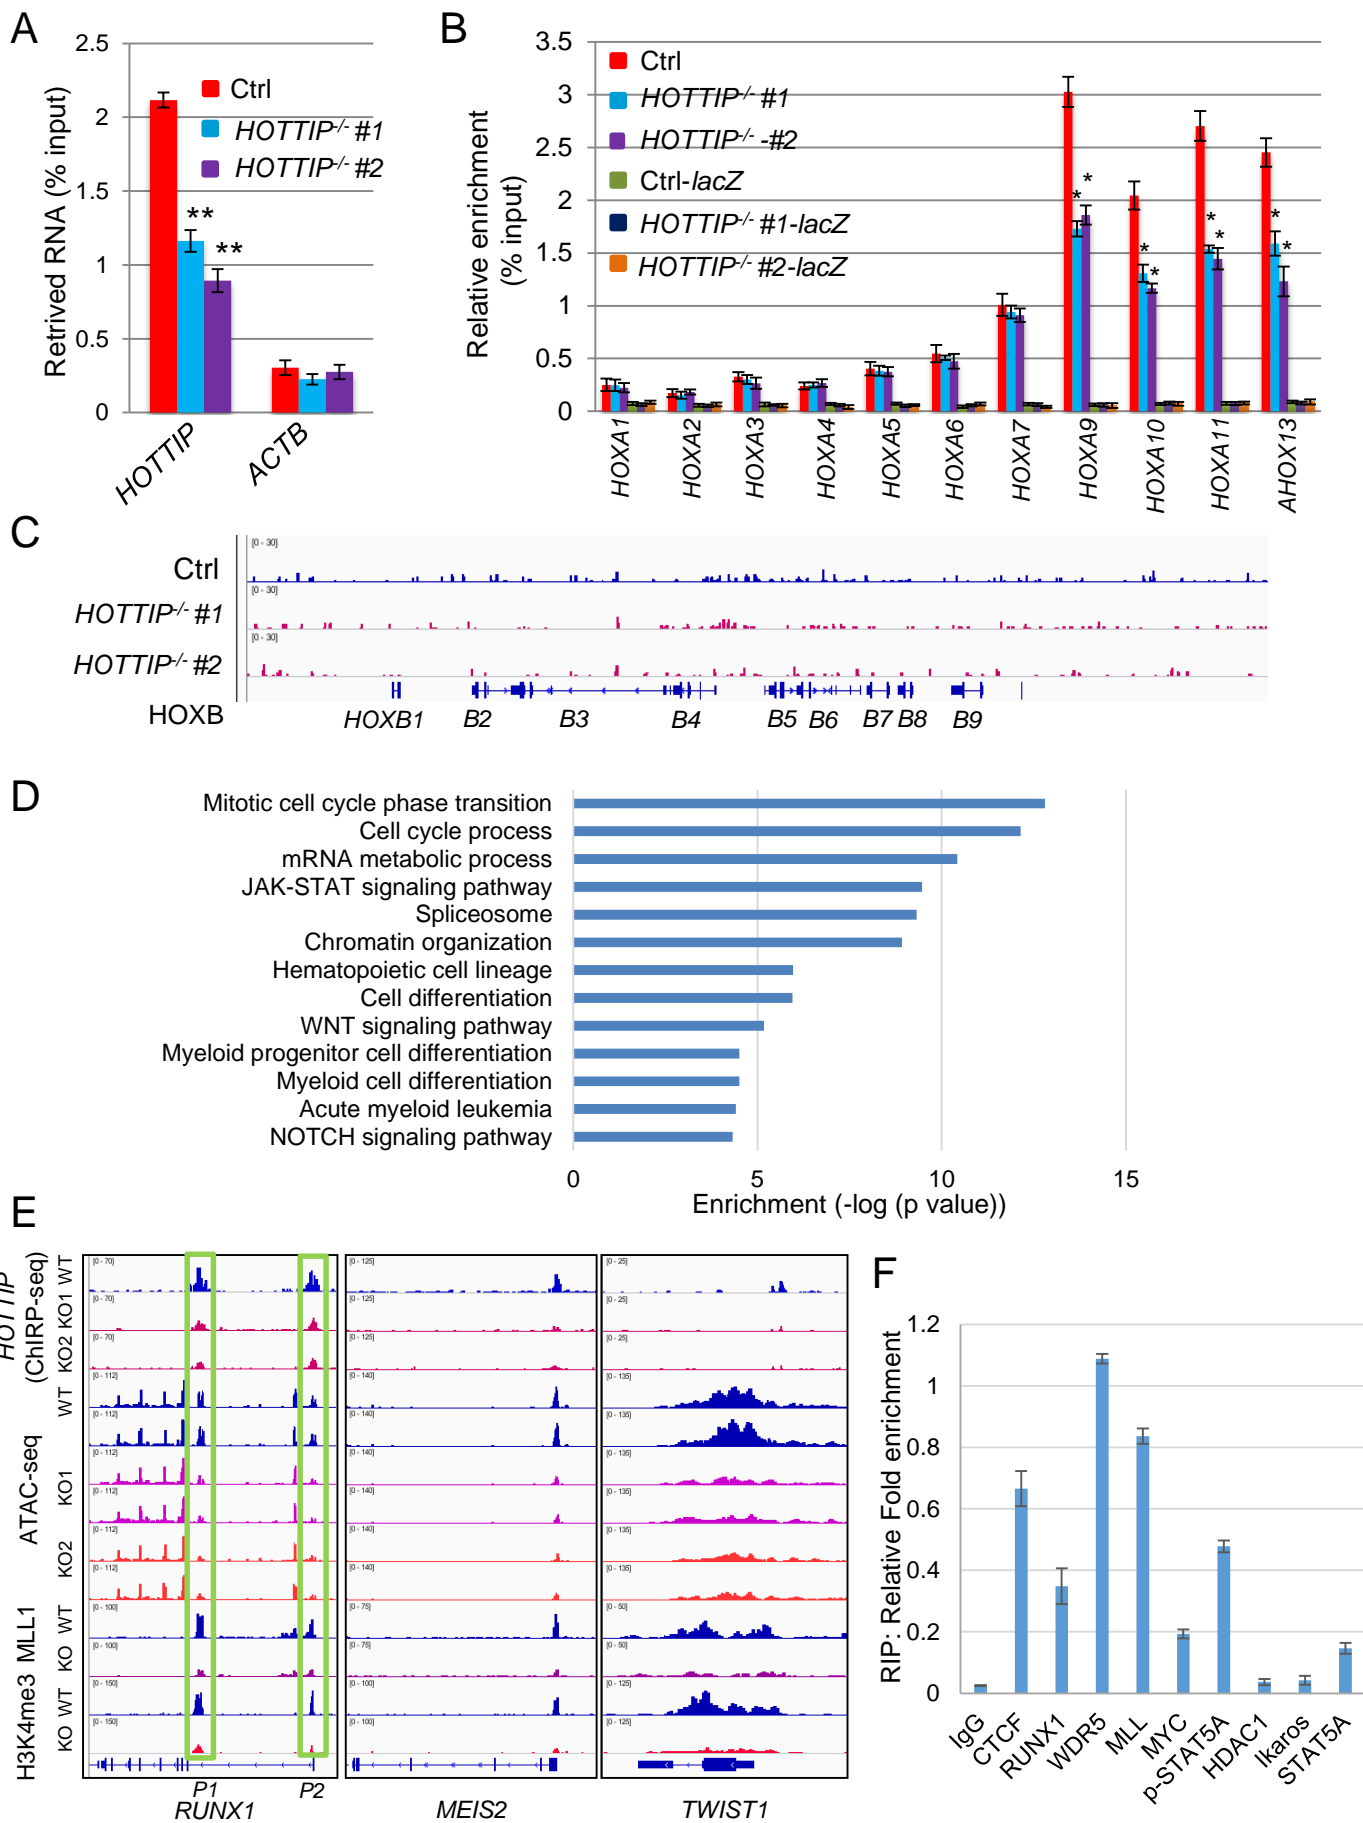

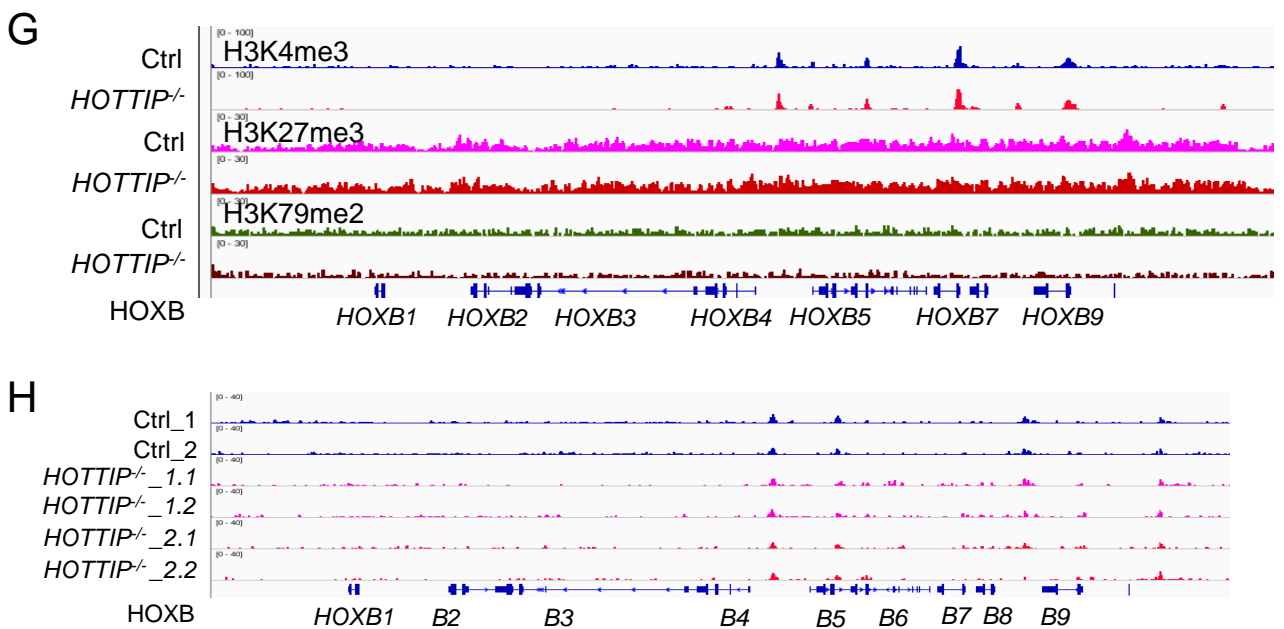

**Supplementary Figure 3. Related to Figure 3; Deletion of *HOTTIP* in AML cells perturbs its binding to chromatin as well as target gene chromatin structure and accessibility. (A)** RT-qPCR analysis of RNA retrieved by the complementary *HOTTIP*-tiling probes and *lacZ* probes compared WT and *HOTTIP*<sup>-/-</sup> MOLM13 cells. Error bars show mean  $\pm$  SD from three to four independent experiments; \* $p < 0.05$ ; \*\* $p < 0.01$  by Student's t-test. **(B)** ChIRP-qPCR analysis of the *HOTTIP* RNA enrichment at the *HOXA* locus compared WT and *HOTTIP*<sup>-/-</sup> MOLM13 cells. Error bars show mean  $\pm$  SD from three to four independent experiments; \* $p < 0.05$ ; \*\* $p < 0.01$  by Student's t-test. **(C)** ChIRP-seq analysis of *HOTTIP* lncRNA binding in the *HOXB* locus compared WT and *HOTTIP*<sup>-/-</sup> MOLM13 cells. **(D)** The genes and pathways regulated by the *HOTTIP* bound intergenic regions were analyzed and annotated by the Gene Ontology analysis. **(E)** Alterations in *HOTTIP* binding (ChIRP-seq), chromatin accessibility (ATAC-seq), MLL1 recruitment and H3K4me3 enrichment (ChIP-seq) in the *HOTTIP* *trans* regulated genes, *RUNX1*, *MEIS2*, and *TWIST1*, compared WT and *HOTTIP* KO MOLM13 cells. P1: promoter 1 of *RUNX1*; P2: promoter 2 of *RUNX1*. **(F)** RT-qPCR analysis of *HOTTIP* RNA retrieved by antibodies against RUNX1, WDR5, MLL1, MYC, and p-STAT5A precipitated from the MOLM13 nuclear extract. **(G)** ChIP-seq analysis of changes in H3K4me3, H3K27me3, and H3K79me2 modification levels in the *HOXB* locus in the MOLM13 cells compared with the WT and the *HOTTIP*<sup>-/-</sup>. **(H)** ATAC-seq analysis of changes in chromatin accessibility upon *HOTTIP*<sup>-/-</sup> in MOLM13 cells. Shown are altered promoter chromatin accessibility in the *HOXB* locus.

**Table S1:** Transcription factor bound Motifs analyzed and annotated using ChIRP-seq and ATAC-seq datasets. Related to Figure 3.

| <b>ATAC associated</b> |                |  | <b>HOTTIP-CHIRP</b> |                |
|------------------------|----------------|--|---------------------|----------------|
| <b>Motif</b>           | <b>p value</b> |  | <b>Motif</b>        | <b>p value</b> |
| ETS1                   | 1.00E-465      |  | E-box               | 1.00E-658      |
| CTCF                   | 1.00E-341      |  | CRE                 | 1.00E-520      |
| E-Box                  | 1.00E-265      |  | RUNX1               | 1.00E-467      |
| CRE                    | 1.00E-231      |  | HOXA13              | 1.00E-360      |
| RUNX1                  | 1.00E-215      |  | c-Myc               | 1.00E-320      |
| c-Myc                  | 1.00E-180      |  | MEIS1               | 1.00E-280      |
| Max                    | 1.00E-139      |  | USF1                | 1.00E-259      |
| STAT5                  | 1.00E-122      |  | CTCF                | 1.00E-220      |
| USF1                   | 1.00E-118      |  | Max                 | 1.00E-215      |
| E2F                    | 1.00E-98       |  | STAT5               | 1.00E-142      |
| STAT1                  | 1.00E-87       |  | TEAD4               | 1.00E-120      |
| PU.1                   | 1.00E-81       |  | Smad3               | 1.00E-101      |
| STAT3                  | 1.00E-70       |  | SOX9                | 1.00E-91       |
| Nanog                  | 1.00E-49       |  | HLF                 | 1.00E-78       |
| YY1                    | 1.00E-35       |  | MYB                 | 1.00E-69       |
| ATF3                   | 1.00E-22       |  | CDX4                | 1.00E-60       |
| FOXA1                  | 1.00E-18       |  | ELF4                | 1.00E-48       |
| SP2                    | 1.00E-14       |  | USF2                | 1.00E-36       |
| ATF1                   | 1.00E-12       |  | STAT1               | 1.00E-27       |
| FLI1                   | 1.00E-10       |  | PU.1                | 1.00E-16       |
| KLF6                   | 1.00E-08       |  | TCF12               | 1.00E-10       |
| MYB                    | 1.00E-08       |  | Tbx20               | 1.00E-09       |
| NFAT                   | 1.00E-07       |  | ERG                 | 1.00E-08       |
| ELF4                   | 1.00E-06       |  | TCF4                | 1.00E-07       |
| TBX5                   | 1.00E-05       |  | AP1                 | 1.00E-07       |
| E2A                    | 1.00E-05       |  | LHX1                | 1.00E-06       |
| TCF4                   | 1.00E-05       |  | ATF1                | 1.00E-05       |
|                        |                |  | FRA1                | 1.00E-05       |

**Table S2:** Statistical analysis of ATAC differential peaks and p value. Related to Figures 3, 5 and 8.

| <b>Ctrl vs <i>HOTTIP</i><sup>-/-</sup></b> |              |            |                                    |                    |               |
|--------------------------------------------|--------------|------------|------------------------------------|--------------------|---------------|
| <b>Chr</b>                                 | <b>start</b> | <b>end</b> | <b>log2FoldChange (Ctrl vs KO)</b> | <b>Adj p value</b> | <b>Genes</b>  |
| chr7                                       | 27239961     | 27240137   | 2.653                              | 3.28E-13           | <i>HOTTIP</i> |
| chr7                                       | 27200117     | 27201441   | 2.385                              | 1.45E-08           | <i>HOXA9</i>  |
| chr7                                       | 27239593     | 27240001   | 1.917                              | 1.58E-10           | <i>HOXA13</i> |
| chr21                                      | 36260643     | 36261680   | 1.614                              | 5.63E-06           | <i>RUNX1</i>  |
| chr17                                      | 40440299     | 40440741   | 1.445                              | 1.72E-08           | <i>STAT5A</i> |
| chr8                                       | 128747648    | 128748815  | 1.411                              | 3.61E-06           | <i>MYC</i>    |
| chr7                                       | 27219354     | 27220019   | 1.395                              | 4.17E-05           | <i>HOXA10</i> |
| chr7                                       | 27224552     | 27225091   | 1.378                              | 3.63E-05           | <i>HOXA11</i> |
| chr19                                      | 51728058     | 51728855   | 1.356                              | 4.11E-06           | <i>CD33</i>   |
| chr7                                       | 19156515     | 19157393   | 1.346                              | 5.20E-08           | <i>TWIST1</i> |
| chr15                                      | 37393235     | 37393784   | 1.338                              | 5.19E-05           | <i>MEIS2</i>  |
| chr9                                       | 128509129    | 128509991  | 1.327                              | 3.45E-06           | <i>PBX3</i>   |
| chr4                                       | 55523944     | 55524288   | 1.214                              | 7.64E-07           | <i>KIT</i>    |

| <b><i>HOTTIP</i>-VP vs <i>CBS7/9</i><sup>+/-</sup></b> |              |            |                                  |                    |               |
|--------------------------------------------------------|--------------|------------|----------------------------------|--------------------|---------------|
| <b>Chr</b>                                             | <b>start</b> | <b>end</b> | <b>log2FoldChange (VP vs KO)</b> | <b>Adj p value</b> | <b>Genes</b>  |
| chr7                                                   | 27239612     | 27239999   | 2.882                            | 5.56E-17           | <i>HOXA13</i> |
| chr7                                                   | 27239945     | 27240143   | 2.265                            | 3.51E-16           | <i>HOTTIP</i> |
| chr21                                                  | 36260648     | 36261668   | 1.831                            | 8.35E-10           | <i>RUNX1</i>  |
| chr15                                                  | 37393239     | 37393779   | 1.776                            | 6.44E-09           | <i>MES12</i>  |
| chr7                                                   | 19156523     | 19157390   | 1.482                            | 1.08E-07           | <i>TWIST1</i> |
| chr2                                                   | 239756363    | 239757156  | 1.387                            | 1.01E-06           | <i>TWIST2</i> |
| chr2                                                   | 66662301     | 66663195   | 1.352                            | 1.98E-05           | <i>MEIS1</i>  |
| chr7                                                   | 27200112     | 27201446   | 1.323                            | 2.04E-09           | <i>HOXA9</i>  |
| chr17                                                  | 40440313     | 40440733   | 1.302                            | 5.33E-07           | <i>STAT5A</i> |
| chr8                                                   | 128747661    | 128748802  | 1.281                            | 6.43E-07           | <i>MYC</i>    |
| chr2                                                   | 145277521    | 145278173  | 1.256                            | 4.11E-06           | <i>ZEB2</i>   |
| chr9                                                   | 128509121    | 128510008  | 1.245                            | 8.97E-05           | <i>PBX3</i>   |
| chr7                                                   | 27219332     | 27220028   | 1.230                            | 5.34E-06           | <i>HOXA10</i> |
| chr7                                                   | 27224556     | 27225095   | 1.202                            | 7.95E-05           | <i>HOXA11</i> |
| chr11                                                  | 128391555    | 128392392  | 1.198                            | 5.49E-06           | <i>ETS1</i>   |



Continued

| <b>Hottip-Tg vs Ctrl LT-HSC</b> |              |            |                                    |                    |               |
|---------------------------------|--------------|------------|------------------------------------|--------------------|---------------|
| <b>Chr</b>                      | <b>start</b> | <b>end</b> | <b>log2FoldChange (HT vs Ctrl)</b> | <b>Adj p value</b> | <b>Genes</b>  |
| chr6                            | 52212340     | 52213115   | 2.268                              | 6.89E-21           | <i>Hottip</i> |
| chr6                            | 52172626     | 52173303   | 2.090                              | 1.21E-20           | <i>Hoxa9</i>  |
| chr6                            | 52209155     | 52210718   | 1.971                              | 3.35E-19           | <i>Hoxa13</i> |
| chr16                           | 92826082     | 92826426   | 1.789                              | 1.21E-16           | <i>Runx1</i>  |
| chr6                            | 52189793     | 52191345   | 1.747                              | 2.26E-18           | <i>Hoxa10</i> |
| chr2                            | 34227091     | 34227906   | 1.521                              | 6.48E-12           | <i>Pbx3</i>   |
| chr11                           | 18918453     | 18919407   | 1.342                              | 6.48E-10           | <i>Meis1</i>  |
| chr15                           | 61816553     | 61817375   | 1.267                              | 3.26E-13           | <i>Myc</i>    |
| chr12                           | 34642150     | 34643195   | 1.204                              | 3.42E-09           | <i>Twist1</i> |
| chr6                            | 52195231     | 52196121   | 1.145                              | 4.98E-07           | <i>Hoxa11</i> |

| <b>Hottip-Tg vs Ctrl ST-HSC</b> |              |            |                                   |                    |               |
|---------------------------------|--------------|------------|-----------------------------------|--------------------|---------------|
| <b>Chr</b>                      | <b>start</b> | <b>end</b> | <b>log2FoldChange(HT vs Ctrl)</b> | <b>Adj p value</b> | <b>Genes</b>  |
| chr6                            | 52212348     | 52213124   | 2.395                             | 1.18E-28           | <i>Hottip</i> |
| chr6                            | 52172626     | 52173303   | 1.805                             | 4.33E-17           | <i>Hoxa9</i>  |
| chr6                            | 52209148     | 52210720   | 1.744                             | 2.13E-11           | <i>Hoxa13</i> |
| chr2                            | 34227085     | 34227911   | 1.673                             | 1.06E-15           | <i>Pbx3</i>   |
| chr16                           | 92826076     | 92826431   | 1.512                             | 9.67E-13           | <i>Runx1</i>  |
| chr6                            | 52189788     | 52191356   | 1.486                             | 1.20E-18           | <i>Hoxa10</i> |
| chr15                           | 61816547     | 61817382   | 1.399                             | 9.91E-12           | <i>Myc</i>    |
| chr6                            | 52195236     | 52196129   | 1.376                             | 9.21E-08           | <i>Hoxa11</i> |
| chr11                           | 18918478     | 18919416   | 1.246                             | 6.43E-12           | <i>Meis1</i>  |
| chr12                           | 34642143     | 34643190   | 1.213                             | 8.64E-07           | <i>Twist1</i> |

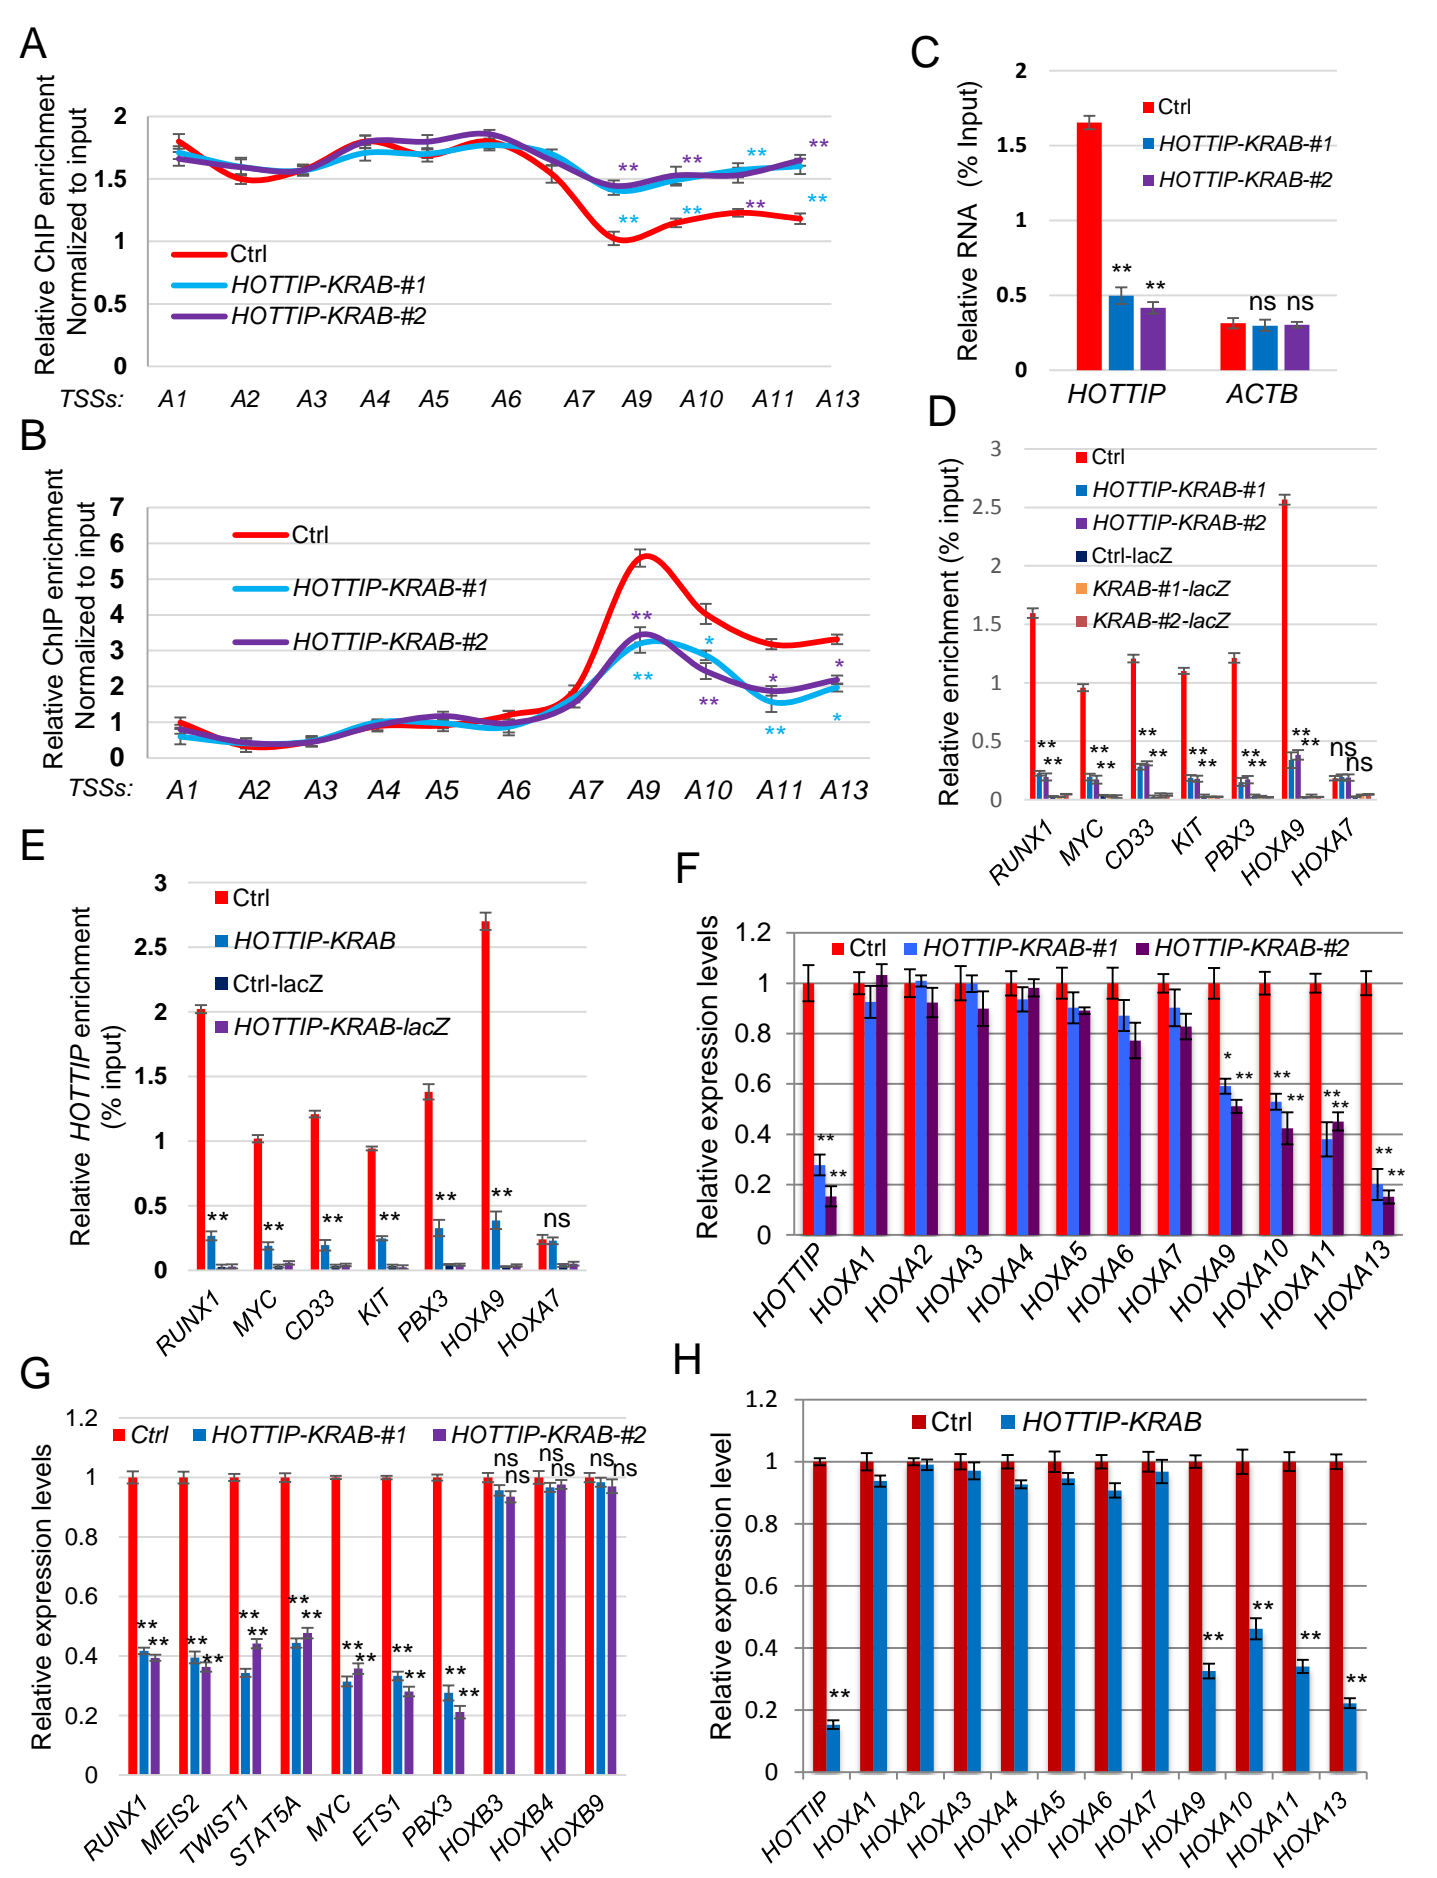

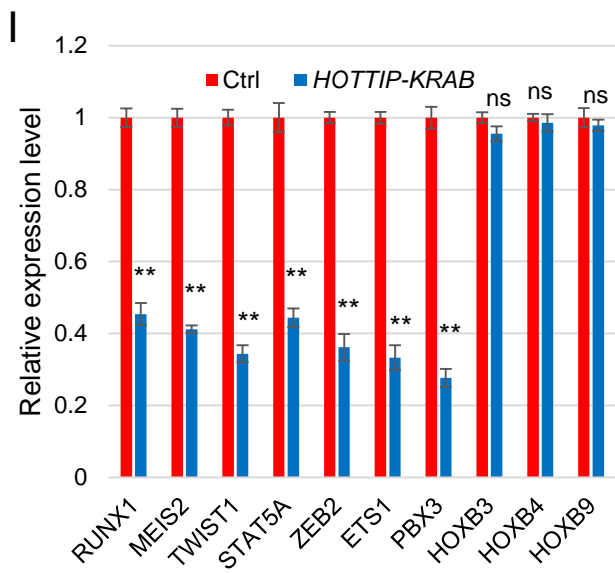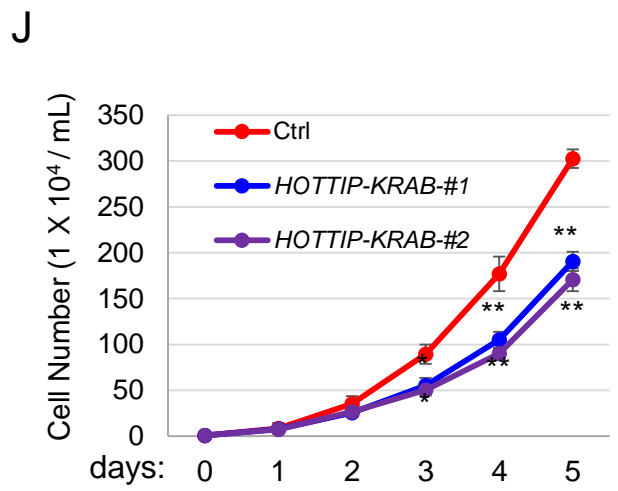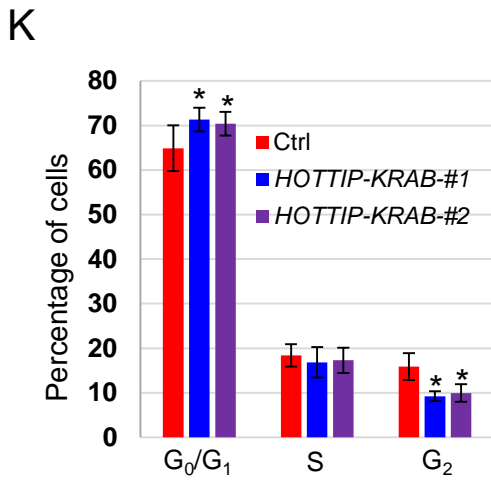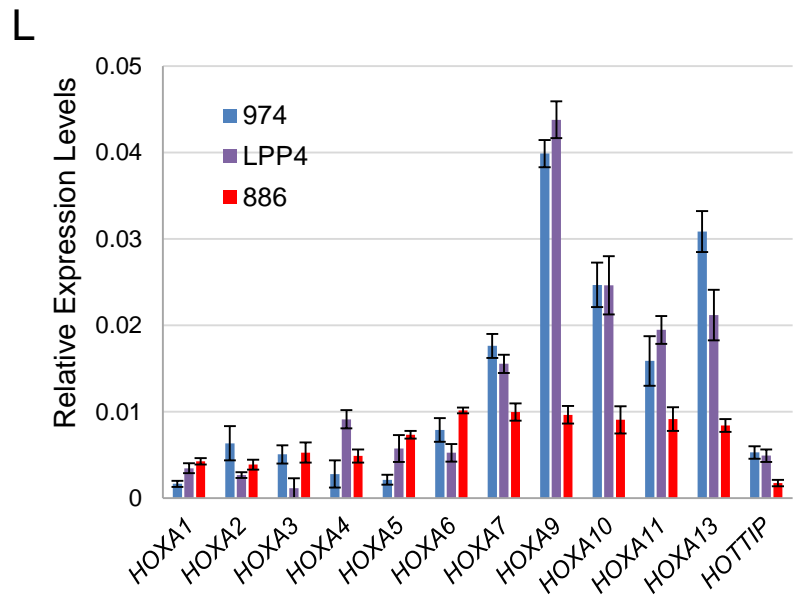

**Supplementary Figure 4. Related to Figures 4; *dCas9-KRAB* mediated inhibition of *HOTTIP* lncRNA resulted in inhibition of active histone modifications and elevated repressive histone modifications in the posterior *HOXA* domain. (A, B)** ChIP analysis of H3K9me2 **(A)** and H3K4me3 **(B)** enrichment at the *HOXA* locus compared WT control and *HOTTIP-dCas9-KRAB* MOLM13 clones. **(C)** RT-qPCR analysis of RNA retrieved by the complementary *HOTTIP*-tiling probes compared WT and *HOTTIP-dCas9-KRAB* inhibited MOLM13 cells. **(D)** ChIRP-qPCR analysis of the *HOTTIP* RNA enrichment at the *HOXA9* and other hematopoietic/leukemia specific genes compared WT and *HOTTIP-dCas9-KRAB* MOLM13 cells. **(E)** ChIRP-qPCR analysis of the *HOTTIP* RNA enrichment at the *HOXA9* and other hematopoietic/leukemia specific genes compared WT and *HOTTIP-dCas9-KRAB* OCI-AML3 cells carrying *NPM1<sup>C+</sup>* mutation. **(F)** RT-qPCR analysis of *HOXA* gene expression in *MLL*-rearranged MOLM13 cells compared the WT control and the *HOTTIP-dCas9-KRAB* clones. **(G)** RT-qPCR validation of the key altered hematopoietic/leukemic genes identified by RNA-seq analysis compared among the WT control and two *HOTTIP-dCas9-KRAB* clones. **(H)** RT-qPCR analysis of *HOXA* gene expression in *NPM1<sup>C+</sup>* mutated OCI-AML3 cells compared the WT control and the *HOTTIP-dCas9-KRAB* clones. **(I)** RT-qPCR validation of the key altered hematopoietic/leukemic genes identified by RNA-seq analysis compared among the WT control and *HOTTIP-KRAB* OCI-AML3 clones. **(J)** Proliferation curves of WT control and the *HOTTIP-dCas9-KRAB* MOLM13 clones were measured by cell viability count. **(K)** FACS analysis of cell cycle was carried out using propidium iodide staining of the WT control or the *HOTTIP-dCas9-KRAB* MOLM13 clones. **(L)** RT-qPCR analysis of the expression levels of *HOTTIP* and *HOXA* genes in primary AML patient BM cells carrying *MLL<sup>r+</sup>* (LPP4), *NPM1<sup>C+</sup>/FLT3-ITD<sup>+</sup>* (974), or *NPM1<sup>C</sup>/FLT3-ITD<sup>+</sup>* (886). For statistics, data is presented as mean  $\pm$  SD from three to four independent experiments; \*p<0.05; \*\*p<0.01 by Student's t-test.

A

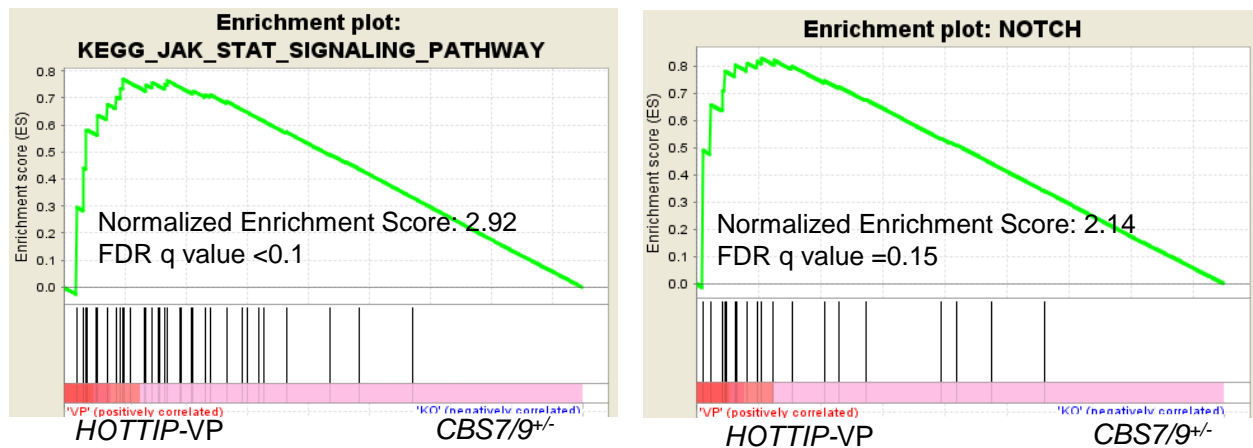

B

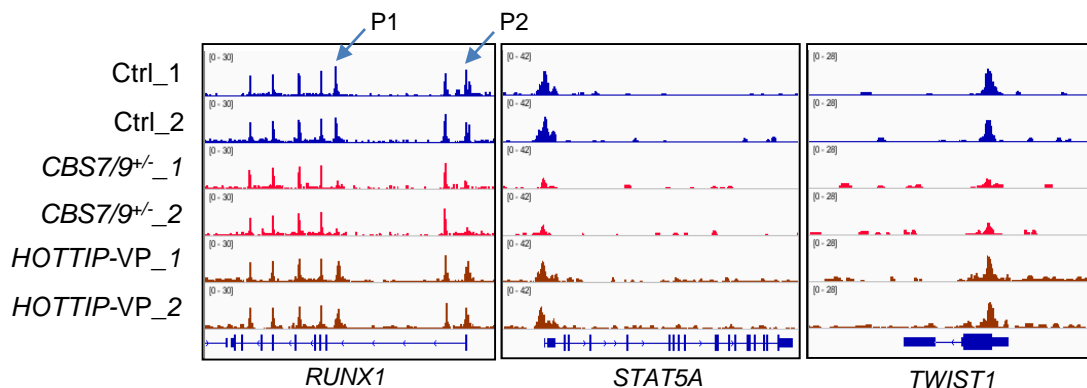

C

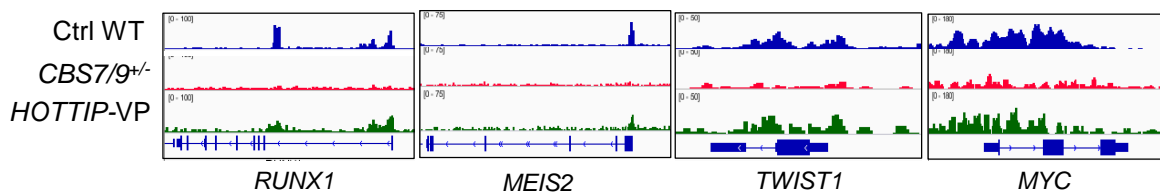

D

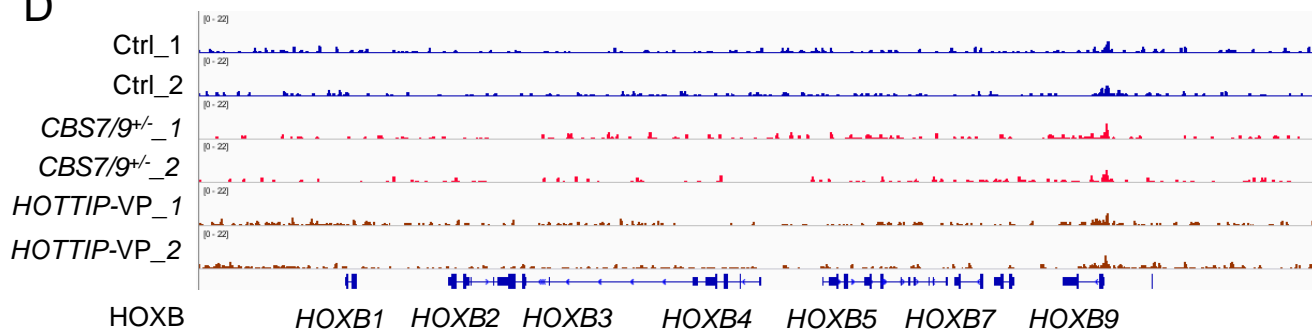

**Supplementary Figure 5. Related to Figure 5; Reactivation of *HOTTIP* IncRNA rescues the posterior *HOXA* chromatin defects and gene expression in the *CBS7/9* boundary-disrupted AML cells. (A)** Enrichment of upregulated target genes involved in JAK-STAT signaling and NOTCH signaling pathways in the *dCas9-VP-160* mediated *HOTTIP* activated *CBS7/9<sup>+/-</sup>* MOLM13 clones compared to the *CBS7/9<sup>+/-</sup>* MOLM13 cells as shown by GSEA. **(B)** Snap shot of ATAC-seq analysis of *RUNX1*(Left), *STAT5A* (Middle), and *TWIST1* (Right) loci compared among WT MOLM13 control, *CBS7/9<sup>+/-</sup>* MOLM13 cells, and the *dCas9-VP-160* mediated *HOTTIP* activated *CBS7/9<sup>+/-</sup>* MOLM13 clones. **(C)** ChIP-seq analysis of MLL1 recruitment in the Non-*HOX* targets compared among WT MOLM13 control, *CBS7/9<sup>+/-</sup>* MOLM13 cells, and the *dCas9-VP-160* mediated *HOTTIP* activated *CBS7/9<sup>+/-</sup>* MOLM13 clones. **(D)** ATAC-seq analysis of the alteration of chromatin accessibility in the *HOXB* locus compared among WT MOLM13 control, *CBS7/9<sup>+/-</sup>* MOLM13 cells, and the *dCas9-VP-160* mediated *HOTTIP* activated *CBS7/9<sup>+/-</sup>* MOLM13 clones.

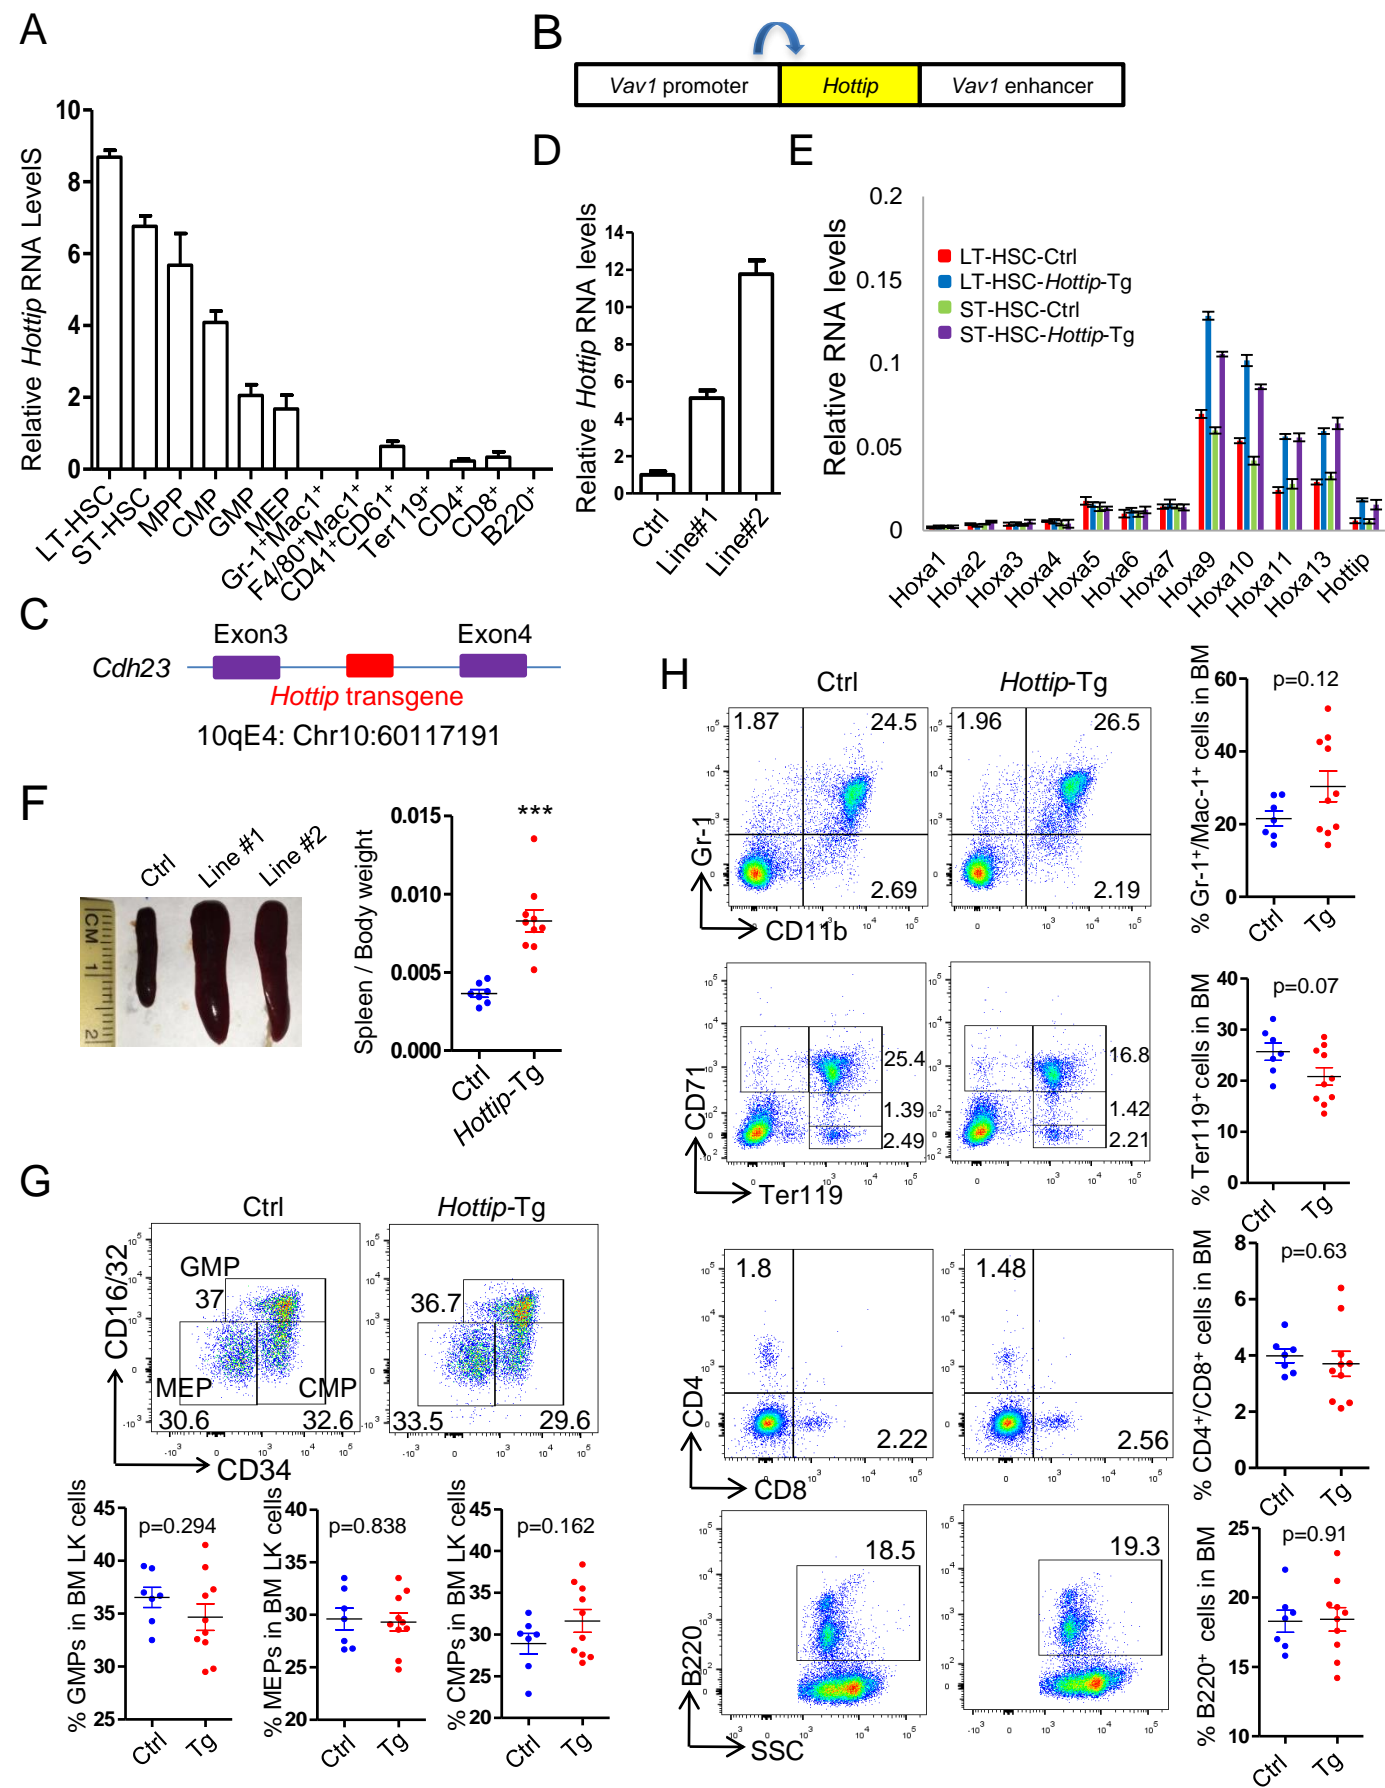

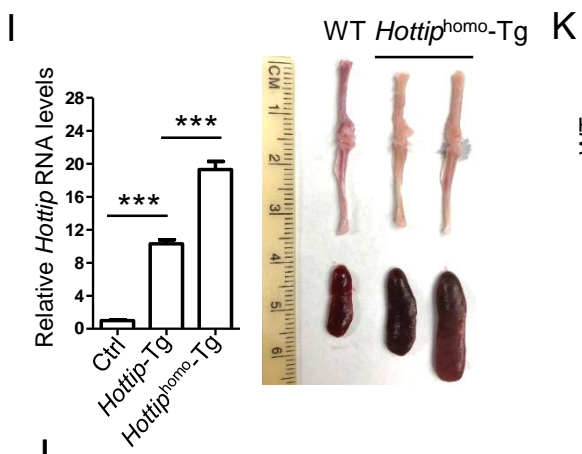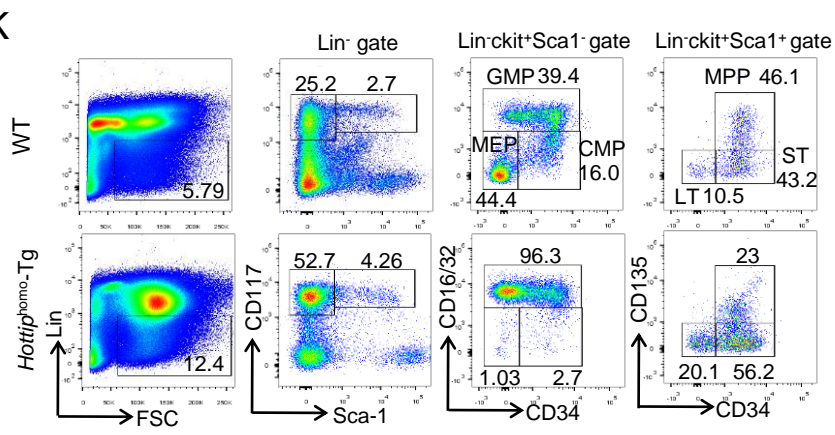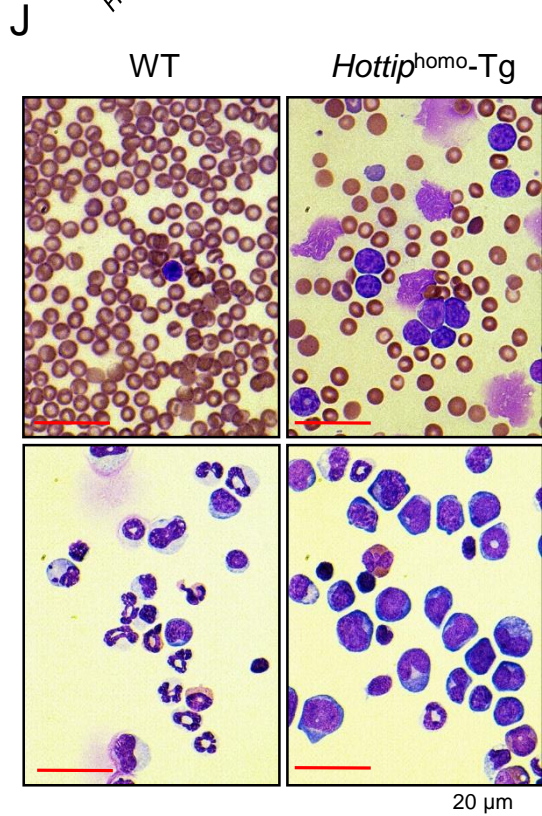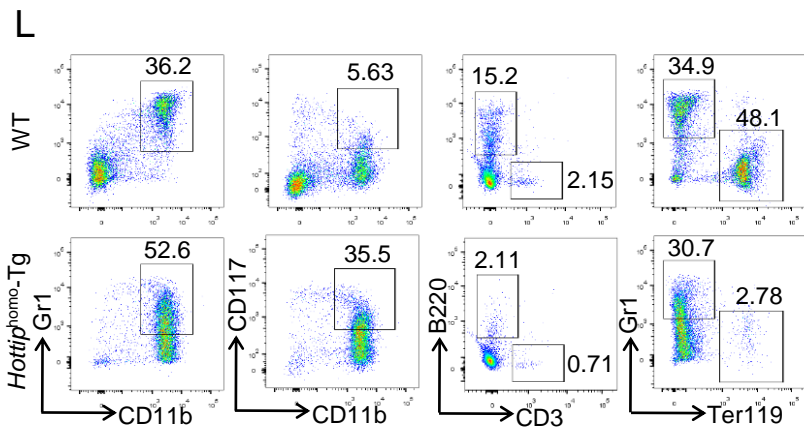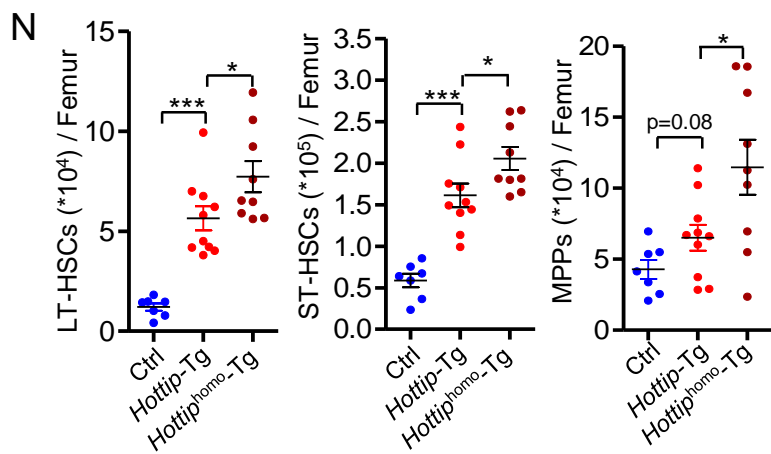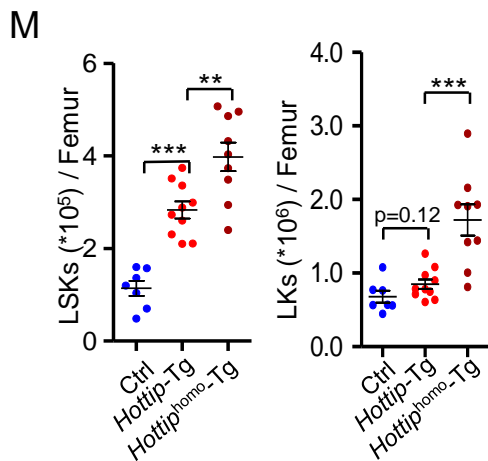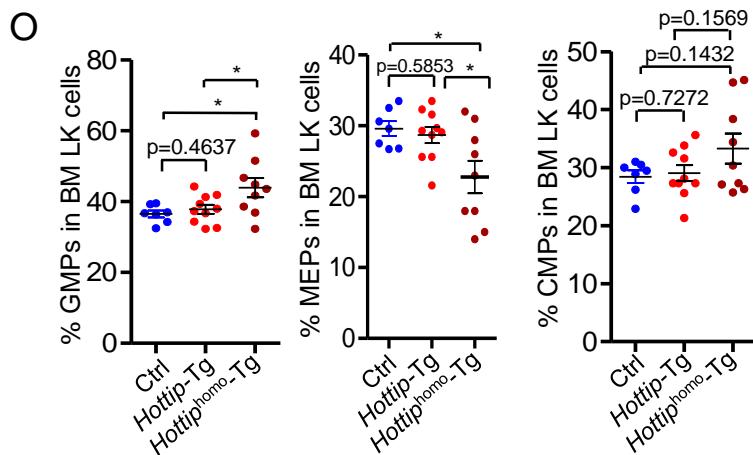



**Supplementary Figure 6. Related to Figure 6; *Hottip* lncRNA transgenic expression in hematopoietic compartment perturbs HSC function and results in AML-like disease.**

(A) RT-qPCR analyses of *Hottip* RNA expression pattern of FACS-sorted different cell populations of WT mice. (B) Diagram of the *Vav1* promoter driven *Hottip* transgene strategy. (C) PCR based transgenic integrating location identification (TAIL) assay maps the *Vav1*-*Hottip* transgene integration site in the mouse chromosome 10. (D) RT-qPCR analysis of *Hottip* RNA expression in BM cells of WT and 2 lines of the *Hottip*-Tg mice. (E) RT-qPCR analysis of *Hottip* and *Hoxa* gene expression from purified LT-HSC and ST-HSC populations from WT control and *Hottip*-Tg mice. (F) Gross appearance of spleens of representative WT and two lines of *Hottip*-Tg mice (left). Showing is spleen/body weight ratio (right) for age matched WT (n = 7) and the *Hottip*-Tg (n = 10) mice. (G) FACS analysis of GMP, MEP and CMP populations within BM LK cells of representative young WT and *Hottip*-Tg mice (Top). Quantitation of the percentage of GMP, MEP and CMP cell populations in the Lin<sup>-</sup>ckit<sup>+</sup>Sca1<sup>-</sup> cells of each genotype of mice are shown (bottom). n=7-10 mice/genotype. (H) FACS analysis and quantification of myeloid (Gr-1/Mac-1), erythroid (Ter119/CD71), B (B220/SSC) and T (CD4/CD8) cell populations in the BM of representative young WT and *Hottip*-Tg mice (8-week old). (I) The expression levels of *Hottip* in WT, *Hottip*-Tg, and *Hottip*<sup>homo</sup>-Tg BM mononuclear cells (Left) as well as gross appearance of spleens and femurs of representative WT and moribund *Hottip*<sup>homo</sup>-Tg mice (Right). (J) May-Giemsa stained PB smears and BM cytopins prepared from representative WT and moribund *Hottip*<sup>homo</sup>-Tg mice. (K) FACS analysis of Lin<sup>-</sup>, LSK/LK, GMP/CMP, MEP, as well as LT-HSC/ST-HSC/MPP cell populations in the BM of representative young WT and *Hottip*<sup>homo</sup>-Tg mice. (L) FACS analysis and quantification of myeloid (Gr-1/Mac-1), erythroid (Ter119), B (B220/SSC) and T (CD4/CD8) cell populations in the BM of representative young WT and *Hottip*-Tg mice (8-week old). (M) Quantitation of the total LSK and LK cell populations per femur of young WT (n=7), *Hottip*-Tg (n=10), and *Hottip*<sup>homo</sup>-Tg (n=9) mice are shown. (N) Quantitation of the total LT-HSC, ST-HSC and MPP cell numbers per femur of young WT (n=7), *Hottip*-Tg (n=10), and *Hottip*<sup>homo</sup>-Tg (n=9) mice are shown. (O) Quantitation of the total GMP, MEP, and CMP cell populations per femur of young WT (n=7), *Hottip*-Tg (n=10), and *Hottip*<sup>homo</sup>-Tg (n=9) mice are shown. For statistics, data (Panels F-I, M-O) is presented as mean ± SD.

**Table S3:** Indel and snp variants analysis of whole exome sequencing of the *Hottip*-Tg AML mice. Related to Figure 6.

| <b>strelka method for exome-seq snp and indel analysis</b> |     |              |            |                        |                      |
|------------------------------------------------------------|-----|--------------|------------|------------------------|----------------------|
| <b>sample name #</b>                                       |     | <b>indel</b> | <b>snp</b> | <b>indel_AA_change</b> | <b>snp_AA_change</b> |
| <i>Hottip</i> -Tg mice                                     | 22  | 39           | 35         | 1                      | 15                   |
|                                                            | 39  | 81           | 50         | 3                      | 14                   |
|                                                            | 48  | 47           | 63         | 4                      | 14                   |
|                                                            | 51  | 49           | 76         | 2                      | 27                   |
|                                                            | 55  | 37           | 44         | 3                      | 16                   |
| WT mice                                                    | 69  | 54           | 52         | 4                      | 14                   |
|                                                            | 130 | 42           | 42         | 1                      | 15                   |
| Recurrent mutation gene                                    |     |              |            |                        |                      |
| <i>Mroh2a</i>                                              |     |              |            |                        |                      |

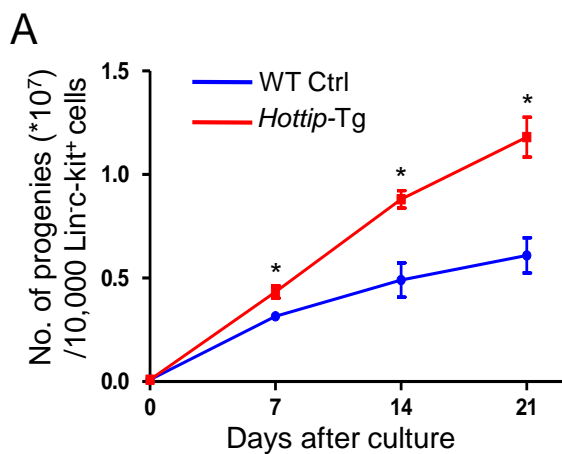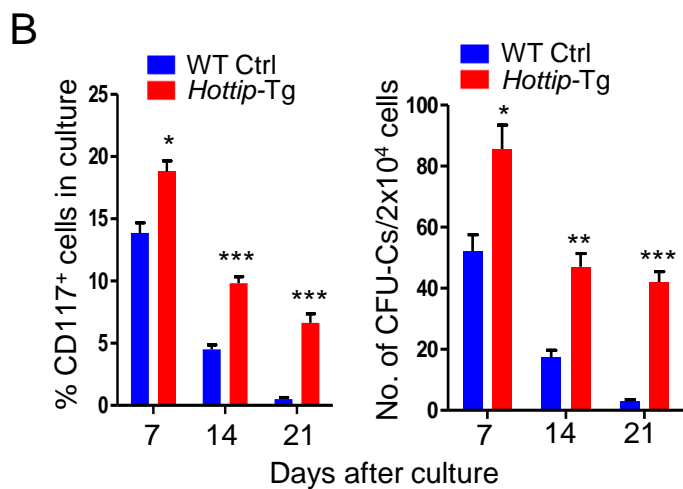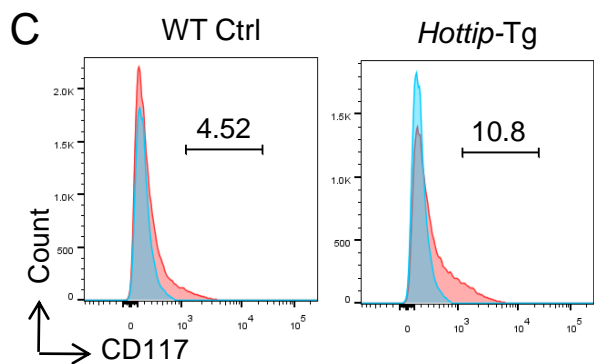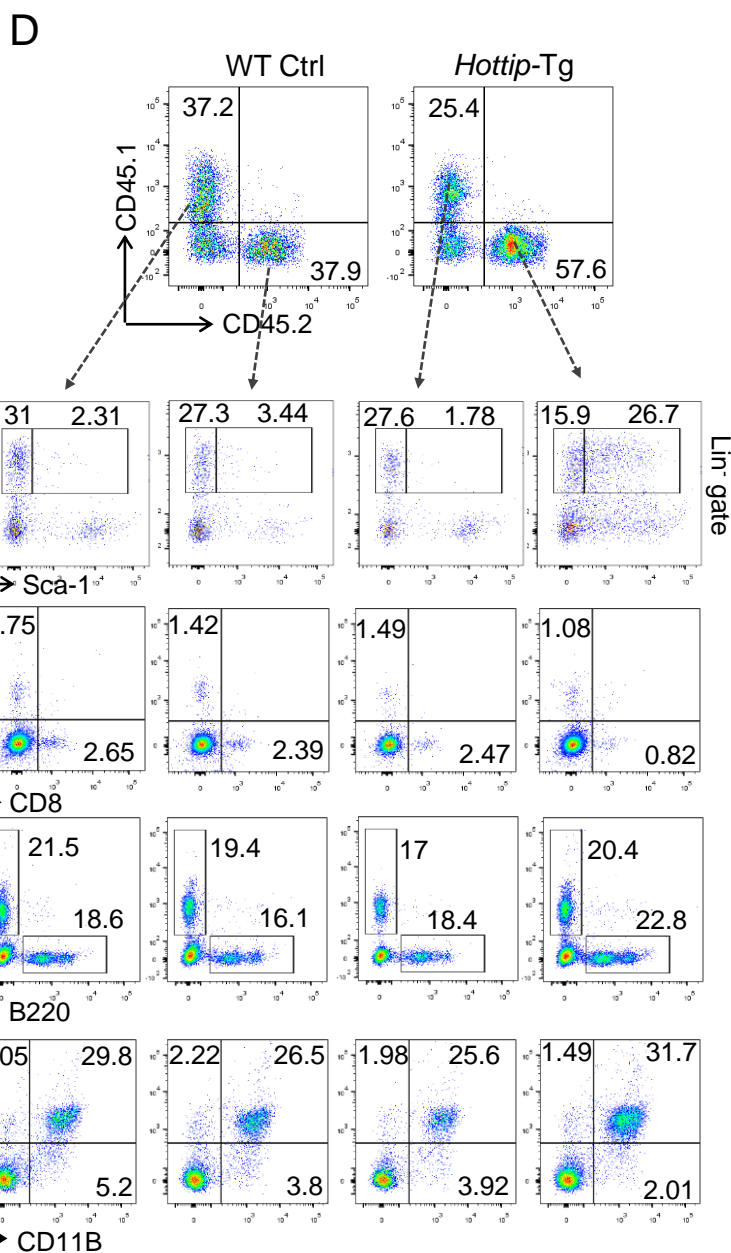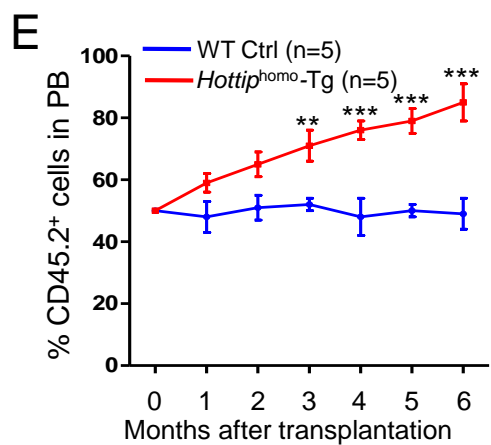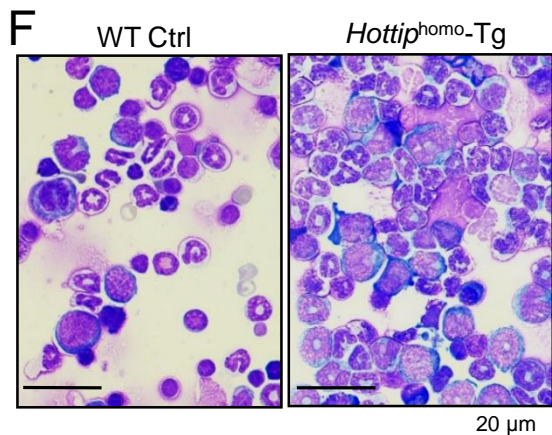

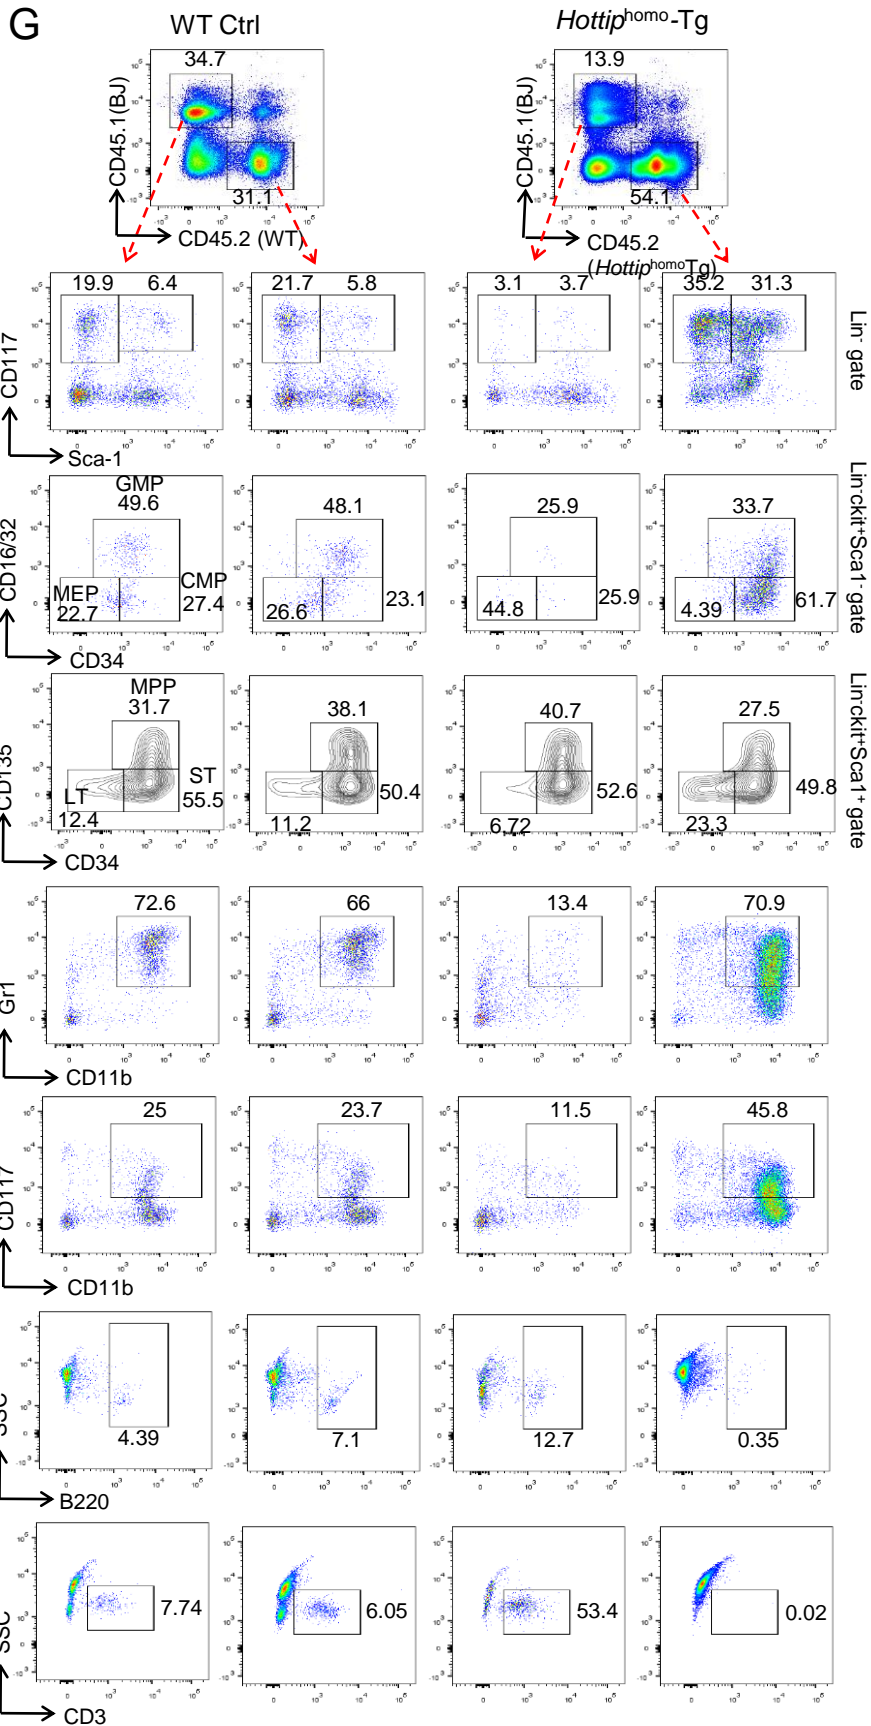

**Supplementary Figure 7. Related to Figures 7; *Hottip* regulates self-renewal and proliferation of HSCs.** (A-C) The expansion and proliferation potential of WT and *Hottip*-Tg HSC/HPCs were examined by culturing BM Lin<sup>-</sup>c-Kit<sup>+</sup> cells in the presence of SCF, TPO, IL-3, G-CSF and EPO. No. of total cells (A), percent c-Kit<sup>+</sup> cells and No. of CFU-Cs (B) in the progenies of Lin<sup>-</sup>c-Kit<sup>+</sup> cells cultured for 7, 14 and 21 days were shown; representative histogram showed the c-Kit (CD117) expression in the cultures of WT and *Hottip*-Tg Lin<sup>-</sup>c-Kit<sup>+</sup> cells for 14 days (C). (D) FACS analysis showing CD45.2 v.s. CD45.1 chimerism as well as their respective distribution of LSK/LK cell (within Lin<sup>-</sup> cells) and lineage populations in the BM of representative mice receiving WT or *Hottip*-Tg BM cells. (E) Kinetic FACS analyses of CD45.2 (Donor) chimerisms in the PB of recipients (CD45.1) receiving WT or *Hottip*<sup>Homo</sup>-Tg BM cells. (F) Images of May–Grunwald–Giemsa stained cytopsin preparations of BM cells from representative mice receiving WT or *Hottip*<sup>Homo</sup>-Tg BM cells. Scale bar, 20 μm. (G) FACS analysis showing CD45.2 vs. CD45.1 chimerism and their respective lineage distribution of LSK/LK, GMP/CMP/MEP, LT-HSC/ST-HSC/MPP cell populations, as well as lineage distribution of myeloid, B and T (CD3/B220), immature myeloid in the BM of representative mice receiving WT or *Hottip*<sup>Homo</sup>-Tg BM cells. For statistics, data (Panels A, B, and E) is presented as mean ± SD.

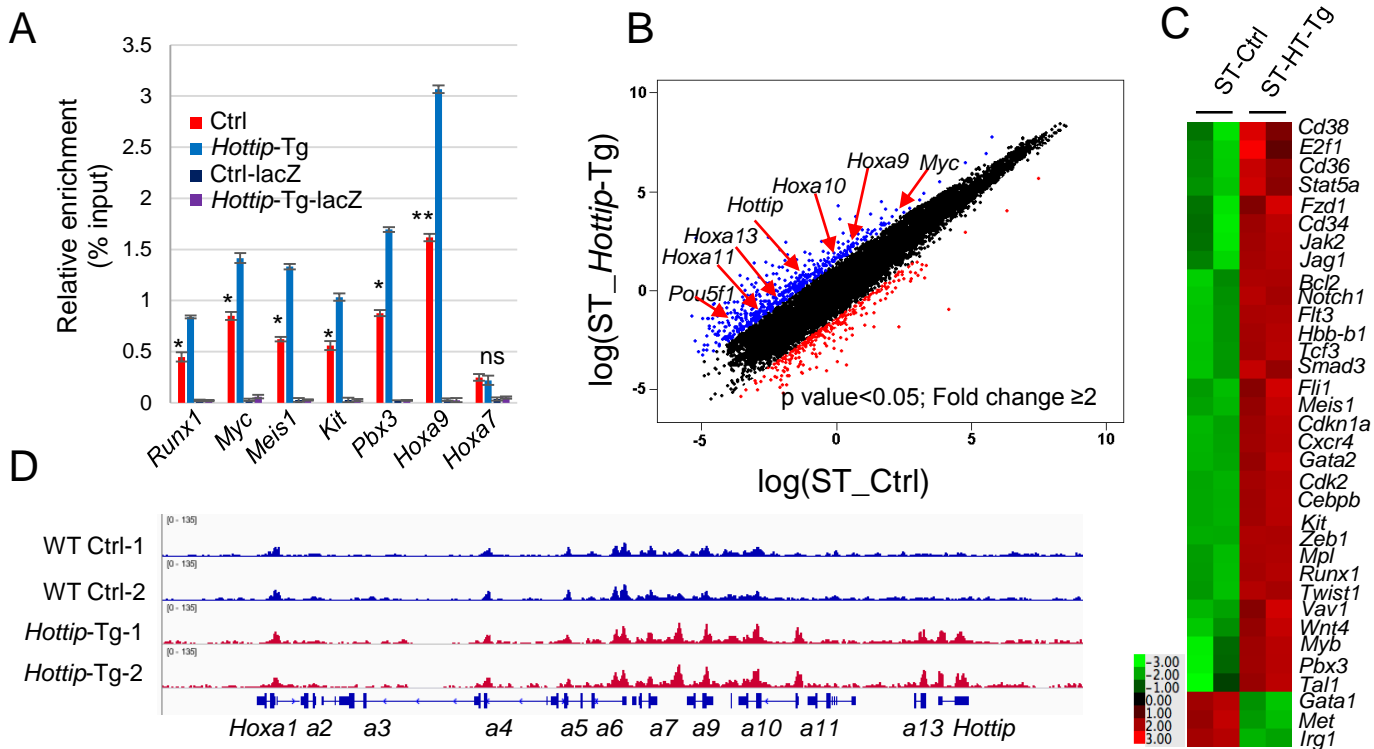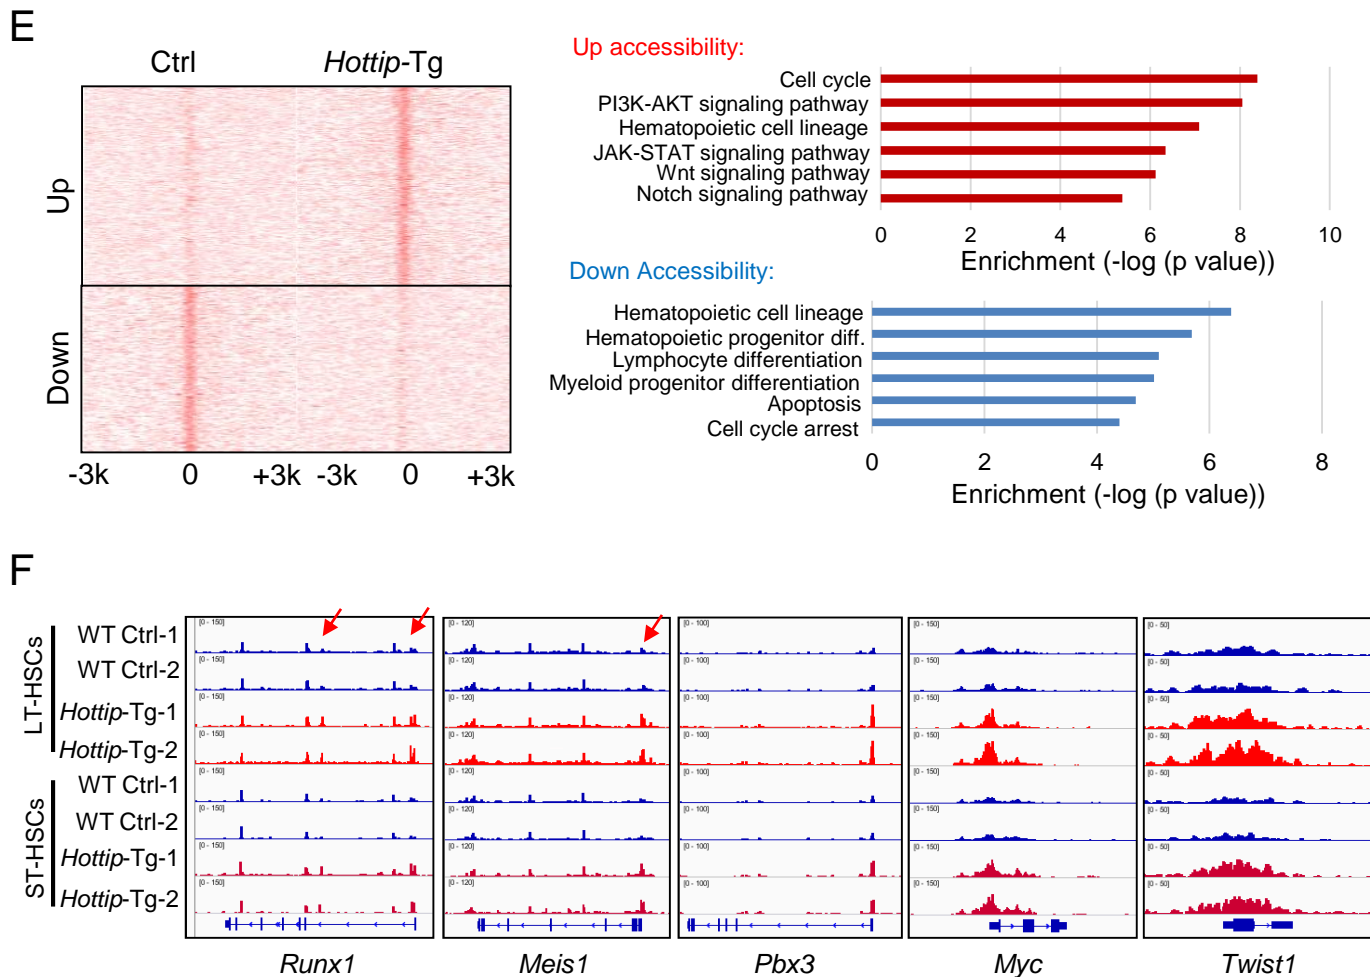

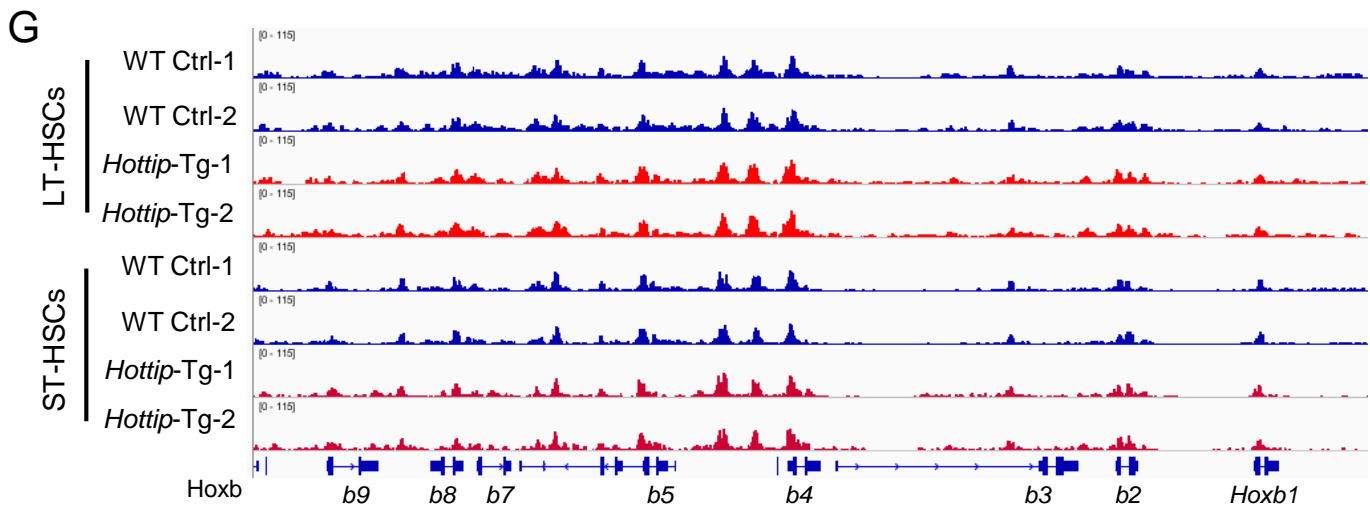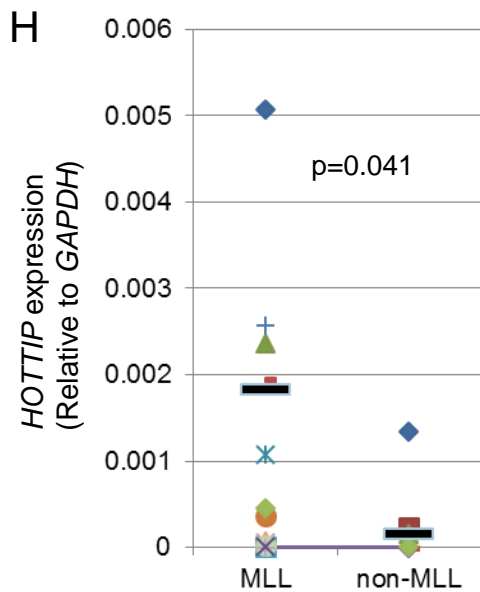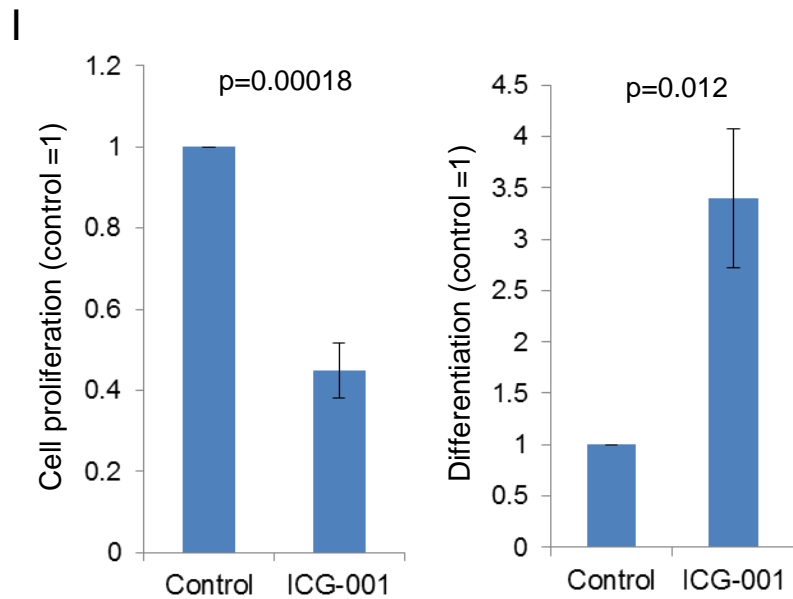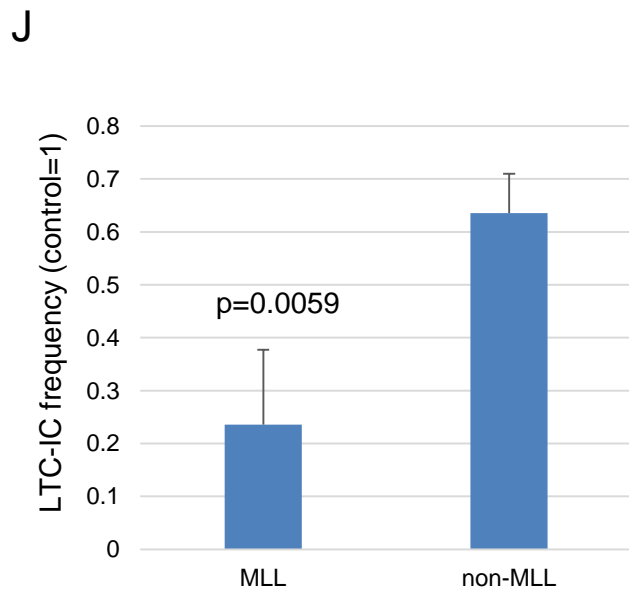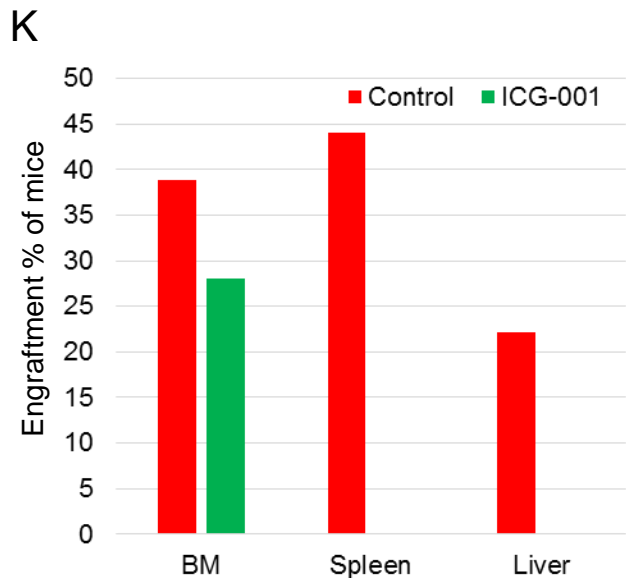

**Supplementary Figure 8. Related to Figure 8; Transgenic expression of *Hottip* lincRNA remodels chromatin structure and alters hematopoietic transcription programs. (A)** ChIRP-RT-qPCR analysis of the *Hottip* RNA enrichment at the *Hoxa7*, *Hoxa9* and other hematopoietic/leukemia specific genes in the purified BM HSCs (Including LT-HSCs and ST-HSCs) compared WT and *Hottip*-Tg mice. Data is presented as mean  $\pm$  SD from three to four independent experiments; \* $p < 0.05$ ; \*\* $p < 0.01$  by Student's t-test. **(B)** Scatter blot of RNA-seq analysis of more than two folds of differentially expressed genes upon overexpression of *Hottip* lincRNA in BM ST-HSC populations of the *Hottip*-Tg mice as compared to WT control. **(C)** Heat map analysis for changed expression of representative genes associated with hematopoiesis and leukemogenesis upon *Hottip* overexpression in BM ST-HSC populations of the *Hottip* Tg mice as compared to WT control (Cutoff: Fold change  $\geq 2$ ; q value  $< 0.05$ ). **(D)** ATAC-seq analysis of chromatin accessibility in the *Hoxa* locus compared the WT control and *Hottip* Tg mouse BM ST-HSCs. **(E)** ATAC-seq promoter density map of ST-HSCs sorted from WT and *Hottip* transgenic BM. Significant upregulated ATAC-seq promoter peaks correlate with GO terms of enriched pathways annotated by GREAT analysis compared between WT control and *Hottip* transgenic ST-HSCs (Top). Significant downregulated ATAC-seq promoter peaks correlate with GO terms of enriched pathways annotated by GREAT analysis compared between WT control and *Hottip* transgenic ST-HSCs (Bottom). **(F)** ATAC-seq analysis of *Hottip* trans-regulated genes important for hematopoiesis and leukemogenesis compared between WT control and the *Hottip*-Tg BM LT-HSC (Top) and ST-HSC (Bottom) populations. **(G)** ATAC-seq analysis of *Hoxb* locus compared between WT control and the *Hottip*-Tg BM LT-HSC (Top) and ST-HSC (Bottom) populations. **(H)** Expression of *HOTTIP* by RT-qPCR. 22 MLL-AML cell lines and primary samples and 7 non-MLL-AML primary samples were subjected to RT-qPCR, the *HOTTIP* expression of each sample were normalized to house-keeping gene GAPDH. The black bar represents the mean expression of each group. p value is determined by Students' t-test. **(I)** MLL-AML samples with high expression levels of *HOTTIP* were either treated with DMSO or ICG-001 (500 nM) and the cells were counted 5 days after treatment. The cell number of each sample was normalized to DMSO control (Left) or the cells were stained with 0.1% NBT and the differentiated cells were NBT-positive. The percentage of NBT-positive cells of each sample was normalized to DMSO control (Right). p value is determined by Students' t-test. **(J)** Primary MLL-AML samples that exhibit high levels of *HOTTIP* expression and Non-MLL samples with very low or silent *HOTTIP* expression levels were either treated with DMSO or ICG-001 (500 nM) and the long-term culture initiating cells (LTC-IC) frequency of each group were determined. The data was normalized with DMSO control which is set to 1. p value is determined by Students' t-test. **(K)** The human engraftment of bone marrow, spleen and liver of leukemic mice were determined by positive on human CD45 and CD33 comparing vehicle (Control; red; n=4) and ICG-001 (50 mg/Kg; green; n=5).
